# Supplementary material for: Marked elevations in lung and plasma ceramide in COVID-19 linked to microvascular injury
Source: JCI journal article supplement (doi:10.1172/jci.insight.156104), 2023-05-21

**Supplementary Table S1.** Subjects' demographic and clinical characteristics, and investigation of biological samples assigned to each subject. Definition of smoking status: non-smoker=never smoker or not currently smoking and smoked less than 5 pack- year; ex-smoker = not currently smoking and smoked more than 5 pack- year; smoker = currently smoking.

Supplementary Table 1: Clinical Characteristics

| Subjects | Age or Age Group | Gender | COVID-19 | Smoking History                  | Clinical Information                                                                           |                                                                                                       |                 | Source                                                                                 | Type of Sample     |                         |                        | Corresponding Experiments |                                 |                       |      |          |
|----------|------------------|--------|----------|----------------------------------|------------------------------------------------------------------------------------------------|-------------------------------------------------------------------------------------------------------|-----------------|----------------------------------------------------------------------------------------|--------------------|-------------------------|------------------------|---------------------------|---------------------------------|-----------------------|------|----------|
|          |                  |        |          |                                  | Comorbidities                                                                                  | Clinical Manifestations at Time of Sampling                                                           | Ventilator Days |                                                                                        | COVID-19 Treatment | HLMVEC (Passage Number) | Lung Tissue Homogenate | Plasma                    | Lung Tissue (Paraffin-Embedded) | Ceramide Measurements | ECIS | Ceramids |
| S1       | 69               | F      | No       | ex-smoker (0.5 pcd x20-25 years) | N/A                                                                                            | ICH, P:F ratio 222                                                                                    | N/A             | N/A                                                                                    | NJH                | X (P4, 5, 6)            |                        |                           |                                 | X                     |      |          |
| S2       | 62               | F      | No       | non-smoker                       | N/A                                                                                            | P:F ratio 310                                                                                         | N/A             | N/A                                                                                    | NJH                | X (P4, 5)               |                        |                           |                                 | X                     |      |          |
| S3       | 66               | F      | No       | non-smoker                       | N/A                                                                                            | N/A                                                                                                   | N/A             | N/A                                                                                    | NJH                | X (P4)                  |                        |                           |                                 | X                     |      |          |
| S4       | N/A              | N/A    | No       | not available                    | N/A                                                                                            | N/A                                                                                                   | N/A             | N/A                                                                                    | Lorca              | X (P3, 4, 5, 6)         |                        |                           |                                 | X                     |      |          |
| S5       | 56               | F      | No       | non-smoker                       | N/A                                                                                            | P:F ratio 372                                                                                         | N/A             | N/A                                                                                    | NJH                |                         | X                      |                           |                                 | X                     |      |          |
| S6       | 57               | M      | No       | marijuana 2-3x/week x1 year      | N/A                                                                                            | P:F ratio 350                                                                                         | N/A             | N/A                                                                                    | NJH                |                         | X                      |                           |                                 | X                     |      |          |
| S7       | 52               | M      | No       | non-smoker                       | N/A                                                                                            | P:F ratio 375                                                                                         | N/A             | N/A                                                                                    | NJH                |                         | X                      |                           |                                 | X                     |      |          |
| S8       | 24               | M      | No       | non-smoker                       | N/A                                                                                            | P:F ratio 400                                                                                         | N/A             | N/A                                                                                    | NJH                |                         | X                      |                           |                                 | X                     |      |          |
| S9       | 31               | M      | No       | 1 cigarette/day x1 year          | N/A                                                                                            | P:F ratio 491                                                                                         | N/A             | N/A                                                                                    | NJH                |                         | X                      |                           |                                 | X                     |      |          |
| S10      | 65               | F      | No       | non-smoker                       | N/A                                                                                            | P:F ratio 470                                                                                         | N/A             | N/A                                                                                    | NJH                |                         | X                      |                           |                                 | X                     |      |          |
| S11      | 56               | M      | No       | non-smoker                       | N/A                                                                                            | N/A                                                                                                   | N/A             | N/A                                                                                    | NJH                |                         | X                      |                           |                                 | X                     |      |          |
| S12      | 43               | M      | No       | possible marijuana use           | N/A                                                                                            | P:F ratio 435                                                                                         | N/A             | N/A                                                                                    | NJH                |                         | X                      |                           |                                 | X                     |      |          |
| S13      | 36               | F      | No       | N/A                              | N/A                                                                                            | N/A                                                                                                   | N/A             | N/A                                                                                    | NJH                |                         | X                      |                           |                                 | X                     |      |          |
| S14      | 56               | F      | No       | N/A                              | N/A                                                                                            | N/A                                                                                                   | N/A             | N/A                                                                                    | NJH                |                         | X                      |                           |                                 | X                     |      |          |
| S15      | 35               | F      | No       | N/A                              | N/A                                                                                            | N/A                                                                                                   | N/A             | N/A                                                                                    | NJH                |                         | X                      |                           |                                 | X                     |      |          |
| S16      | 38               | F      | No       | non-smoker                       | N/A                                                                                            | N/A                                                                                                   | N/A             | N/A                                                                                    | NJH                |                         | X                      |                           |                                 | X                     |      |          |
| S17      | 37               | F      | No       | N/A                              | N/A                                                                                            | N/A                                                                                                   | N/A             | N/A                                                                                    | NJH                |                         | X                      |                           |                                 | X                     |      |          |
| S18      | 32               | F      | No       | N/A                              | N/A                                                                                            | N/A                                                                                                   | N/A             | N/A                                                                                    | NJH                |                         | X                      |                           |                                 | X                     |      |          |
| S19      | 56               | F      | No       | N/A                              | N/A                                                                                            | N/A                                                                                                   | N/A             | N/A                                                                                    | NJH                |                         | X                      |                           |                                 | X                     |      |          |
| S20      | 37               | F      | No       | N/A                              | N/A                                                                                            | N/A                                                                                                   | N/A             | N/A                                                                                    | NJH                |                         | X                      |                           |                                 | X                     |      |          |
| S21      | 60               | F      | No       | N/A                              | N/A                                                                                            | N/A                                                                                                   | N/A             | N/A                                                                                    | NJH                |                         | X                      |                           |                                 | X                     |      |          |
| S22      | 35               | F      | No       | N/A                              | N/A                                                                                            | N/A                                                                                                   | N/A             | N/A                                                                                    | NJH                |                         | X                      |                           |                                 | X                     |      |          |
| S23      | 40               | F      | No       | N/A                              | N/A                                                                                            | N/A                                                                                                   | N/A             | N/A                                                                                    | NJH                |                         | X                      |                           |                                 | X                     |      |          |
| S24      | 79               | F      | No       | non-smoker                       | N/A                                                                                            | P:F ratio 572                                                                                         | N/A             | N/A                                                                                    | NJH                |                         |                        | X                         |                                 |                       | X    |          |
| S25      | 52               | M      | No       | active smoker (30 pack-year)     | N/A                                                                                            | P:F ratio 263                                                                                         | N/A             | N/A                                                                                    | NJH                |                         |                        | X                         |                                 |                       |      | X        |
| S26      | 64               | M      | No       | non-smoker                       | N/A                                                                                            | SAH, P:F ratio 375                                                                                    | N/A             | N/A                                                                                    | NJH                |                         |                        | X                         |                                 |                       |      | X        |
| S27      | 52               | M      | No       | active smoker                    | HTN, HLD, obesity                                                                              | N/A                                                                                                   | 7               | N/A                                                                                    | NJH/SJH            |                         | X                      |                           |                                 |                       | X    |          |
| S28      | 62               | M      | No       | active smoker                    | HTN, HLD, obesity                                                                              | N/A                                                                                                   | 5               | N/A                                                                                    | NJH/SJH            |                         | X                      |                           |                                 |                       | X    |          |
| S29      | 61               | F      | No       | ex-smoker (12 pack-year)         | N/A                                                                                            | ICH, ARDS from chest trauma, P:F ratio 115, fibrotic ARDS.                                            | N/A             | N/A                                                                                    | NJH                |                         |                        | X                         |                                 |                       |      | X        |
| S30      | 50-59            | F      | Yes      | N/A                              | asthma, DM                                                                                     | AcRespFall, multiple infections, refractory hypoxia                                                   | N/A             | HCO <sub>2</sub> , steroids                                                            | MSMC               |                         | X                      |                           |                                 | X                     |      |          |
| S31      | 30-39            | M      | Yes      | N/A                              | HTN                                                                                            | AcRespFall, multiple AcRespFall requiring intubation, AKI, AFib, hypotension                          | N/A             | HCO <sub>2</sub> , steroids                                                            | MSMC               |                         | X                      |                           |                                 | X                     |      |          |
| S32      | 70-79            | M      | Yes      | N/A                              | HTN, DM, asthma, CKD                                                                           | AcRespFall, multiple AcRespFall requiring intubation, AKI, AFib, hypotension                          | N/A             | anticoagulation                                                                        | MSMC               |                         | X                      |                           |                                 | X                     |      |          |
| S33      | 70-79            | M      | Yes      | N/A                              | Parkinson's, HLD, GERD                                                                         | AFib, bacterial pneumonia                                                                             | N/A             | HCO <sub>2</sub> , anticoagulation                                                     | MSMC               |                         | X                      |                           |                                 | X                     |      |          |
| S34      | 60-69            | M      | Yes      | N/A                              | HTN, GERD                                                                                      | AcRespFall with refractory hypoxia and hypotension                                                    | N/A             | azithromycin, HCO <sub>2</sub>                                                         | MSMC               |                         | X                      | X                         |                                 | X                     |      | X        |
| S35      | 60-69            | M      | Yes      | N/A                              | heart failure, CAD, DM, HTN, HLD, obesity                                                      | AcRespFall, gram negative sepsis                                                                      | N/A             | HCO <sub>2</sub> , azithromycin, anticoagulation                                       | MSMC               |                         | X                      | X                         |                                 | X                     |      | X        |
| S36      | 60-69            | M      | Yes      | N/A                              | HIV, organ transplant, HTN, cancer in remission                                                | AcRespFall, multiple cardiac arrests                                                                  | N/A             | azithromycin, methylprednisolone, anticoagulation                                      | MSMC               |                         | X                      | X                         |                                 | X                     |      | X        |
| S37      | 63               | F      | Yes      | ex-smoker                        | HTN, trigeminal neuropathy, left bundle branch block, PE                                       | N/A                                                                                                   | 4               | None                                                                                   | NJH/SJH            |                         | X                      |                           |                                 | X                     | X    |          |
| S38      | 64               | M      | Yes      | active smoker                    | DM, CKD, DVT, depression, hypothyroidism, intellectual disability                              | N/A                                                                                                   | 5               | convalescent plasma, remdesivir                                                        | NJH/SJH            |                         | X                      |                           |                                 | X                     | X    |          |
| S39      | 57               | F      | Yes      | non-smoker                       | DM, obesity, HTN                                                                               | N/A                                                                                                   | 6               | convalescent plasma                                                                    | NJH/SJH            |                         | X                      |                           |                                 | X                     | X    |          |
| S40      | 79               | F      | Yes      | non-smoker                       | HTN                                                                                            | N/A                                                                                                   | 3               | dexamethasone                                                                          | NJH/SJH            |                         | X                      |                           |                                 | X                     | X    |          |
| S41      | 69               | F      | Yes      | non-smoker                       | hypothyroidism, DM, HTN, HLD, PE                                                               | N/A                                                                                                   | 4               | none                                                                                   | NJH/SJH            |                         | X                      |                           |                                 | X                     | X    |          |
| S42      | 53               | M      | Yes      | non-smoker                       | DM, CAD, HTN, hypothyroidism, anxiety, schizophrenia, depression, OCD                          | N/A                                                                                                   | 2               | HCO <sub>2</sub>                                                                       | NJH/SJH            |                         | X                      |                           |                                 | X                     | X    |          |
| S43      | 82               | F      | Yes      | ex-smoker                        | HTN                                                                                            | N/A                                                                                                   | 1               | convalescent plasma, dexamethasone                                                     | NJH/SJH            |                         | X                      |                           |                                 | X                     | X    |          |
| S44      | 70               | M      | Yes      | non-smoker                       | CAD, AICD placement                                                                            | N/A                                                                                                   | 2               | convalescent plasma, dexamethasone                                                     | NJH/SJH            |                         | X                      |                           |                                 | X                     | X    |          |
| S45      | 40               | F      | Yes      | non-smoker                       | anxiety, hepatitis, pancreatitis, alcohol abuse, essential tremor, depression                  | N/A                                                                                                   | 1               | none                                                                                   | NJH/SJH            |                         | X                      |                           |                                 | X                     | X    |          |
| S46      | 70               | M      | Yes      | ex-smoker                        | DM, CKD, HTN, hypothyroidism, dementia                                                         | N/A                                                                                                   | 2               | remdesivir                                                                             | NJH/SJH            |                         | X                      |                           |                                 | X                     | X    |          |
| S47      | 50               | M      | Yes      | non-smoker                       | obesity                                                                                        | N/A                                                                                                   | 4               | dexamethasone                                                                          | NJH/SJH            |                         | X                      |                           |                                 | X                     | X    |          |
| S48      | 82               | F      | Yes      | ex-smoker                        | HTN                                                                                            | N/A                                                                                                   | 5               | convalescent plasma, dexamethasone                                                     | NJH/SJH            |                         | X                      |                           |                                 | X                     | X    |          |
| S49      | 56               | M      | Yes      | ex-smoker                        | obesity, HTN, heart failure, obstructive sleep apnea, hypertriglyceridemia, DM                 | N/A                                                                                                   | 6               | remdesivir, dexamethasone, convalescent plasma                                         | NJH/SJH            |                         | X                      |                           |                                 | X                     | X    |          |
| S50      | 54               | M      | Yes      | ex-smoker                        | DM, obesity                                                                                    | N/A                                                                                                   | 8               | remdesivir, dexamethasone, convalescent plasma                                         | NJH/SJH            |                         | X                      |                           |                                 | X                     |      |          |
| S51      | 72               | M      | Yes      | ex-smoker                        | asthma, HTN, HLD                                                                               | N/A                                                                                                   | 2               | convalescent plasma, remdesivir                                                        | NJH/SJH            |                         |                        |                           |                                 | X                     | X    |          |
| S52      | 56               | M      | Yes      | non-smoker                       | DM                                                                                             | N/A                                                                                                   | 6               | dexamethasone, remdesivir, convalescent plasma                                         | NJH/SJH            |                         | X                      |                           |                                 | X                     |      |          |
| S53      | 50               | M      | Yes      | non-smoker                       | obesity                                                                                        | N/A                                                                                                   | 8               | dexamethasone                                                                          | NJH/SJH            |                         | X                      |                           |                                 | X                     |      |          |
| S54      | 62               | M      | Yes      | active smoker                    | HTN, asthma, stroke, alcohol and illicit substance abuse                                       | N/A                                                                                                   | 10              | none                                                                                   | NJH/SJH            |                         | X                      |                           |                                 | X                     | X    |          |
| S55      | 50-59            | F      | Yes      | N/A                              | none                                                                                           | died within 2 days of sampling                                                                        | N/A             | none                                                                                   | MSMC               |                         | X                      |                           |                                 | X                     |      |          |
| S56      | 60-69            | M      | Yes      | N/A                              | leukemia in remission, sarcoidosis, DM, HLD, CAD                                               | intubated, requiring pressure, blood and platelet transfusions, cardiac arrhythmias                   | N/A             | enoxaparin, convalescent plasma with transfusion reaction, HCO <sub>2</sub> , steroids | MSMC               |                         | X                      |                           |                                 | X                     |      |          |
| S57      | 50-59            | M      | Yes      | N/A                              | colon cancer                                                                                   | diffuse ground glass opacities, high flow nasal cannula                                               | N/A             | convalescent plasma, remdesivir, enoxaparin, methylprednisolone                        | MSMC               |                         | X                      |                           |                                 | X                     |      |          |
| S58      | 30-39            | M      | Yes      | N/A                              | end stage renal disease on hemodialysis, DM, cardiomyopathy, organ transplant, wound infection | required high flow nasal cannula                                                                      | N/A             | anticoagulation                                                                        | MSMC               |                         | X                      |                           |                                 | X                     |      |          |
| S59      | 20-29            | N/A    | Yes      | N/A                              | HIV, abscess                                                                                   | asymptomatic COVID                                                                                    | N/A             | none                                                                                   | MSMC               |                         | X                      |                           |                                 | X                     |      |          |
| S60      | 20-29            | F      | Yes      | N/A                              | none, in labor                                                                                 | asymptomatic COVID                                                                                    | N/A             | none                                                                                   | MSMC               |                         | X                      |                           |                                 | X                     |      |          |
| S61      | 60-69            | M      | Yes      | N/A                              | hyperglycemia, stroke with hemiplegia, cardiac arrest, anoxic brain injury                     | diffuse ARDS and mild bronchiectasis, ventilator associated pneumonia, died within 2 days of sampling | N/A             | none                                                                                   | MSMC               |                         | X                      |                           |                                 | X                     |      |          |
| S62      | 68               | F      | Yes      | ex-smoker                        | GERD, breast cancer, HLD, osteoarthritis, predM, OSA, stress and urinary incontinence          | ARDS                                                                                                  | 4               | dexamethasone, remdesivir, convalescent plasma                                         | NJH/SJH            |                         | X                      |                           |                                 | X                     |      |          |
| S63      | 66               | F      | Yes      | non-smoker                       | fibromyalgia                                                                                   | ARDS                                                                                                  | 6               | Regeneron                                                                              | NJH/SJH            |                         | X                      |                           |                                 | X                     |      |          |
| S64      | 54               | M      | Yes      | non-smoker                       | alcohol abuse                                                                                  | ARDS                                                                                                  | 6               | HCO <sub>2</sub> , methylprednisolone                                                  | NJH/SJH            |                         | X                      |                           |                                 | X                     |      |          |
| S65      | 89+              | F      | Yes      | N/A                              | HTN, CKD, GERD                                                                                 | AcRespFall with refractory hypoxia and hypotension                                                    | N/A             | azithromycin, HCO <sub>2</sub> , steroids, anticoagulation                             | MSMC               |                         | X                      |                           |                                 | X                     |      |          |
| S66      | 80-89            | F      | Yes      | N/A                              | penicypenia, dementia, HTN                                                                     | AcRespFall, sepsis with vegetations                                                                   | N/A             | anticoagulation                                                                        | MSMC               |                         | X                      |                           |                                 | X                     | X    |          |
| S67      | 80-89            | F      | Yes      | N/A                              | HTN, DM, neurodegenerative disease                                                             | AcRespFall                                                                                            | N/A             | HCO <sub>2</sub> , anticoagulation                                                     | MSMC               |                         | X                      |                           |                                 | X                     | X    |          |
| S68      | 60-69            | M      | Yes      | N/A                              | HIV, hepatitis C with cirrhosis                                                                | AcRespFall                                                                                            | N/A             | azithromycin, HCO <sub>2</sub> , anticoagulation                                       | MSMC               |                         | X                      |                           |                                 | X                     |      |          |
| S69      | 40-49            | M      | Yes      | N/A                              | HIV, HTN, asthma                                                                               | AcRespFall, PE                                                                                        | N/A             | azithromycin, HCO <sub>2</sub> , anticoagulation                                       | MSMC               |                         | X                      |                           |                                 | X                     |      |          |
| S70      | 50-59            | F      | Yes      | N/A                              | HTN, CAD, kidney disease                                                                       | AcRespFall                                                                                            | N/A             | azithromycin, HCO <sub>2</sub> , anticoagulation                                       | MSMC               |                         | X                      |                           |                                 | X                     |      |          |
| S71      | 40-49            | M      | Yes      | N/A                              | HIV, HTN, asthma                                                                               | AcRespFall, PE                                                                                        | N/A             | HCO <sub>2</sub> , anticoagulation                                                     | MSMC               |                         | X                      |                           |                                 | X                     |      | X        |

Abbreviations: F, female; M, male; N/A, not applicable/available; NJH, National Jewish Health Human Lung Tissue Consortium, Denver, CO; SJH, Saint Joseph Hospital, Denver, CO; MSMC, Mount Sinai Medical Center, New York City, NY; X, refers to the type of sample and experiment performed; Blank, not relevant to the subject/sample; pcd, pack per day; HLMVEC, human lung microvascular endothelial cell; P, passage; ECIS, electric cell-substrate impedance sensing; P:F ratio, PaO<sub>2</sub>/FiO<sub>2</sub> ratio; HTN, hypertension; HLD, hyperlipidemia; DM, diabetes mellitus; CAD, coronary artery disease; AKI, acute kidney injury; CKD, chronic kidney disease; OSA, obstructive sleep apnea; HIV, human immunodeficiency virus; DVT, deep vein thrombosis; PE, pulmonary embolism; SAH, subarachnoid hemorrhage; ICH, intracerebral hemorrhage; AFib, atrial fibrillation; AcRespFall, acute hypoxic respiratory failure; ARDS, acute respiratory distress syndrome; HCO<sub>2</sub>, hydrocortisone.

**Supplementary Figure 1. Effect of hydrolyzed COVID-19 patient plasma lipids compared to unmodified COVID-19 patient plasma lipids on human lung microvascular barrier function.** Transcellular electrical resistance (TER) normalized to the time of initial recording ( $\pm$  SEM), measured over time (hours) following addition of unmodified lipids extracted from plasma of COVID-19 patients (COVID PL), COVID PL following alkaline hydrolysis, or vehicle (resuspension buffer).

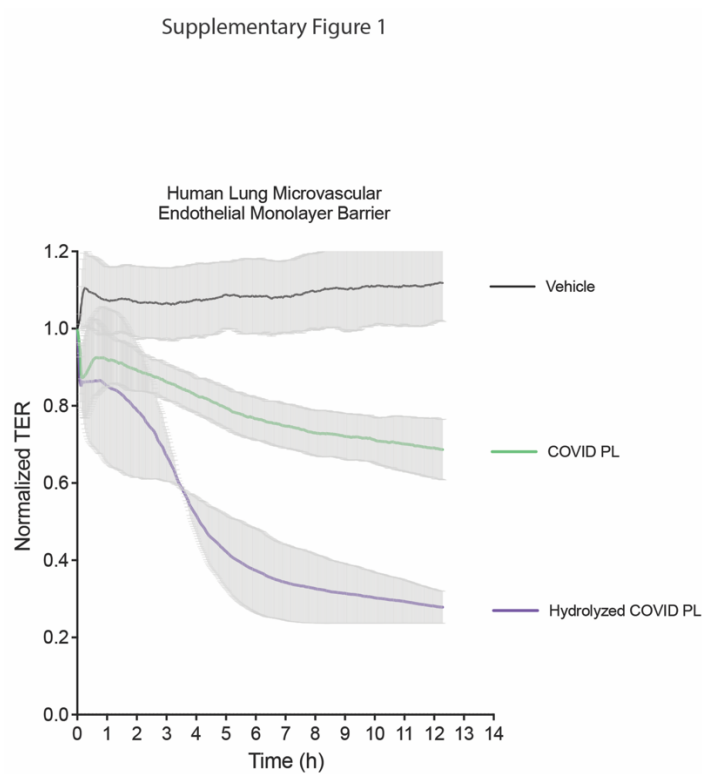

Supplement: sd1 [file 1]
